# Supplementary material for: Interleukin-2 alters distribution of CD144 (VE-cadherin) in endothelial cells
Source: PubMed Central journal article supplement (PMC4062649; doi:10.1186/1479-5876-12-113), 2014-05-06

# Additional file 1: Figure S1

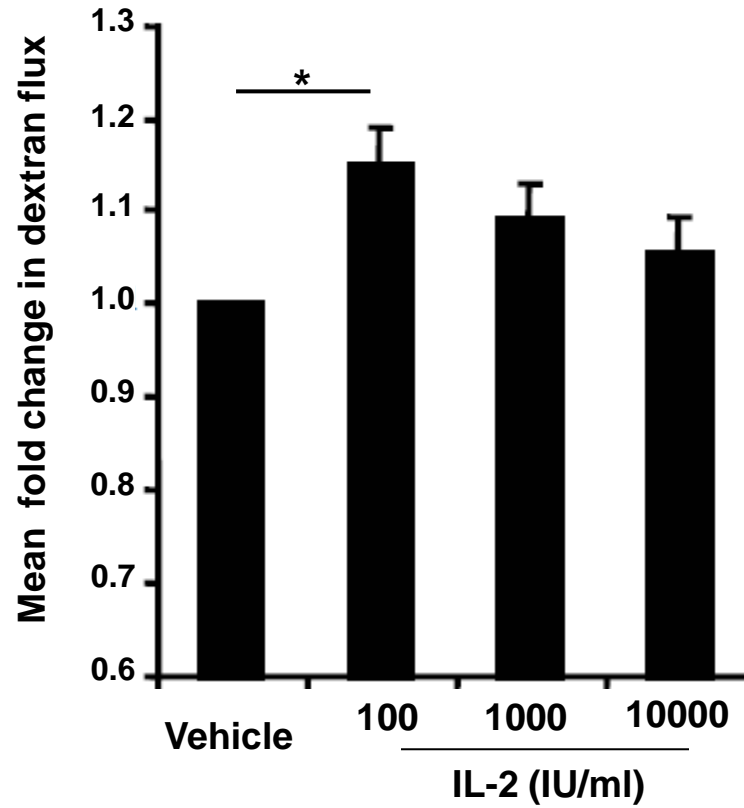

Supplement: 1479-5876-12-113-S1.pdf [file 1479-5876-12-113-S1.pdf]
